# Supplementary material for: Possible solutions to enhance evidence-based practice proposed by rehabilitation professionals in Japan: a Delphi study
Source: PubMed Central journal article supplement — J Phys Ther Sci. 2023 Jan 1;35(1):31–9. doi: 10.1589/jpts.35.31 (PMC9822816; doi:10.1589/jpts.35.31), 2023-01-01
Supplement: jpts-35-031-s001.pdf [file jpts-35-031-s001.pdf]

以下の内容が、EBP の実践に向けた解決策として研究において報告されています。ここに挙げられている内容以外で、何をどのようにすれば EBP の実践に向けた解決策となるか、あなたのアイデアがあれば自由記載で教えてください。

|                                          |                                                                         |
|------------------------------------------|-------------------------------------------------------------------------|
| EBP の実践を阻害する原因                           | 研究で提案されている解決策                                                           |
| セラピストが忙しすぎる点                             | 仕事を複数人に分担して仕事量を減らし、EBP の実施で必要なことに時間が回せるように時間管理をすること                     |
|                                          | 臨床で EBP をするよう上司から明確に指示されること                                             |
| EBP を実践するために必要な患者との良好なコミュニケーションの取り方への困難さ | 医療スタッフ・患者・研究者と一緒にコミュニケーションスキルを高めること                                     |
|                                          | 患者の信頼を高めるために、医療スタッフ間および患者とのコラボレーションを改善するための意識向上キャンペーンを実施すること            |
| EBP の実践へのモチベーションが上がらないこと                 | 初期の段階では奨励金や報奨物などのインセンティブを提供すること                                         |
|                                          | 意識向上セッションを開催して、スタッフのやる気を引き出し、患者に最善のケアを提供する意欲を高めること                      |
| EBP の実践へのサポート体制が不足していること                 | 継続的なトレーニングコースや研修会をセラピストに提供すること                                          |
|                                          | 徐々に EBP という新しい臨床実践を適用して、正確性、完全性、継続性を確保すること                              |
| 患者が EBP の実践を求める態度ではないこと                  | 患者が EBP に関心を持つようなガイドラインを作成し、掲示板、パンフレット、およびホームページのロールアップバナーを通じてそれらを広めること |
|                                          | 患者を治療の意思決定プロセスに巻き込むこと                                                   |
| EBP の実践に対してセラピストの関心が無いこと                 | EBP の導入によるポジティブな結果を強調するスタッフ向けの意識向上セッションを開催すること                          |
|                                          | EBP の知識技術を得ようという意欲あるスタッフのために国内または海外で講習会を用意すること                          |

#### 自由記載欄
