# Supplementary material for: Possible solutions to enhance evidence-based practice proposed by rehabilitation professionals in Japan: a Delphi study
Source: PubMed Central journal article supplement — J Phys Ther Sci. 2023 Jan 1;35(1):31–9. doi: 10.1589/jpts.35.31 (PMC9822816; doi:10.1589/jpts.35.31), 2023-01-01
Supplement: jpts-35-031-s002.pdf [file jpts-35-031-s002.pdf]

以下には、Evidence-based Practice(EBP:エビデンスに基づく臨床)の実践に向けた解決策として、研究知見と専門リハビリテーション研究会の全ての臨床セラピストから挙げられたものをまとめています。日本におけるリハビリテーション専門職の EBP を推進する解決策としてどの程度同意しますか？各意見に対して、最も適するあなたの同意の程度 1 つに✓を入れてください。

| 提案されている解決策                                                   | 全く同意しない | 同意しない | 同意する・しないの<br>どちらでもない | 同意する | 完全に同意する |
|--------------------------------------------------------------|---------|-------|----------------------|------|---------|
| 臨床で EBP をするよう上司から明確に指示されること                                  |         |       |                      |      |         |
| EBP を導入する余裕を持つために、臨床業務を減らす為の具体的な職場での規則を作ること                  |         |       |                      |      |         |
| 仕事を複数人に分担して仕事量を減らし、EBP の実施に必要なことに時間が回せるように時間管理をすること          |         |       |                      |      |         |
| EBP を導入する余裕を持つために、臨床業務にあたる時間を減らすこと                           |         |       |                      |      |         |
| 医療スタッフ・患者・研究者と一緒にコミュニケーションスキルを高めること                          |         |       |                      |      |         |
| 患者の信頼を高めるために、医療スタッフ間および患者とのコラボレーションを改善するための意識向上キャンペーンを実施すること |         |       |                      |      |         |
| 徐々に EBP という新しい臨床実践を適用して、正確性、完全性、継続性を確保すること                   |         |       |                      |      |         |
| 継続的なトレーニングコースや研修会をセラピストに提供すること                               |         |       |                      |      |         |
| 場所や時間を特定しない研修会や講習会を設けること                                     |         |       |                      |      |         |
| EBP の実践について指導できる資格をつくること                                     |         |       |                      |      |         |
| EBP を積極的に実践している人の見学をすること(医師など)                               |         |       |                      |      |         |
| 勤務先で EBP について学ぶ機会を作るための協会等による助成制度を設けること                      |         |       |                      |      |         |
| EBP の実践に役に立つアプリを開発すること                                       |         |       |                      |      |         |
| EBP を促進するために、協会等が医療福祉サービスの効果を示す研究活動を促進する取り組みを強化すること          |         |       |                      |      |         |

| 提案されている解決策                                                     | 全く同意しない | 同意しない | 同意する・しないのどちらでもない | 同意する | 完全に同意する |
|----------------------------------------------------------------|---------|-------|------------------|------|---------|
| 初期の段階では奨励金や報奨物などのインセンティブを提供すること                                |         |       |                  |      |         |
| 意識向上セッションを開催して、スタッフのやる気を引き出し、患者に最善のケアを提供する意欲を高めること             |         |       |                  |      |         |
| EBP の実践度合いを定量化するシステムを作り、遵守度が高まればそれに応じた各職場での評価が行われること           |         |       |                  |      |         |
| EBP の研修会に参加するだけでなく、その後勤務先での伝達者講習を開催した際にも生涯学習ポイントを得られるシステムを作ること |         |       |                  |      |         |
| EBP の実践度合いを定量化するシステムを作り、遵守度が高まればそれに応じて診療報酬が増額されるシステムを作ること      |         |       |                  |      |         |
| 養成校の段階から医療福祉を学ぶ学生に EBP の必要性を強く認識させること                          |         |       |                  |      |         |
| EBP の知識技術を得ようという意欲あるスタッフのために国内または海外で講習会を用意すること                 |         |       |                  |      |         |
| EBP の導入によるポジティブな結果を強調するスタッフ向けの意識向上セッションを開催すること                 |         |       |                  |      |         |
| EBP の概念とそれを実践するツールである診療ガイドラインの客観的な有用性を広くセラピストに周知すること           |         |       |                  |      |         |
| EBP に関する情報や診療ガイドラインをセラピストと患者、両方の目に触れる機会を多く作ること                 |         |       |                  |      |         |
| 著名人が EBP に関する情報を誰もが受け取りやすい形で身近な媒体を通じて表現すること (Youtube などを利用して)  |         |       |                  |      |         |

| 提案されている解決策                                                              | 全く同意しない | 同意しない | 同意する・しないの<br>どちらでもない | 同意する | 完全に同意する |
|-------------------------------------------------------------------------|---------|-------|----------------------|------|---------|
| 患者を治療の意思決定プロセスに巻き込むこと                                                   |         |       |                      |      |         |
| 患者が EBP に関心を持つようなガイドラインを作成し、掲示板、パンフレット、およびホームページのロールアップバナーを通じてそれらを広めること |         |       |                      |      |         |
| テレビ、新聞、雑誌などのマスメディアで広く EBP を取り上げ、EBP の実践が当然であるという社会の認識を作ること              |         |       |                      |      |         |
| EBP の遵守度に関する医療福祉サービスの質を患者側から見えるようにすること                                  |         |       |                      |      |         |
