# Supplementary material for: Possible solutions to enhance evidence-based practice proposed by rehabilitation professionals in Japan: a Delphi study
Source: PubMed Central journal article supplement — J Phys Ther Sci. 2023 Jan 1;35(1):31–9. doi: 10.1589/jpts.35.31 (PMC9822816; doi:10.1589/jpts.35.31), 2023-01-01
Supplement: jpts-35-031-s003.pdf [file jpts-35-031-s003.pdf]

以下には、Evidence-based Practice(EBP:エビデンスに基づく臨床)の実践に向けた解決策として、研究知見と専門リハビリテーション研究会の全ての臨床セラピストから挙げられたものをまとめています。日本におけるリハビリテーション専門職の EBP を推進する解決策としてどの程度同意しますか？前回の全体の意見の分布を踏まえて、各意見に対して、最も適するあなたの同意の程度 1 つに✓を入れてください。

| 提案されている解決策                                          | 前回の調査時の全体の意見の分布 | 全く同意しない | 同意しない | 同意する・しないの<br>どちらでもない | 同意する | 完全に同意する |
|-----------------------------------------------------|-----------------|---------|-------|----------------------|------|---------|
| 臨床で EBP をするように上司から明確に指示されること                        |                 |         |       |                      |      |         |
| EBP を導入する余裕を持つために、臨床業務を減らす為の具体的な職場での規則を作ること         |                 |         |       |                      |      |         |
| 仕事を複数人に分担して仕事量を減らし、EBP の実施で必要なことに時間が回せるように時間管理をすること |                 |         |       |                      |      |         |
| EBP を導入する余裕を持つために、臨床業務にあたる時間を減らすこと                  |                 |         |       |                      |      |         |

| 提案されている解決策                                                   | 前回の調査時の全体の意見の分布 | 全く同意しない | 同意しない | 同意する・しないの<br>どちらでもない | 同意する | 完全に同意する |
|--------------------------------------------------------------|-----------------|---------|-------|----------------------|------|---------|
| 医療スタッフ・患者・研究者と一緒にコミュニケーションスキルを高めること                          |                 |         |       |                      |      |         |
| 患者の信頼を高めるために、医療スタッフ間および患者とのコラボレーションを改善するための意識向上キャンペーンを実施すること |                 |         |       |                      |      |         |
| 徐々に EBP という新しい臨床実践を適用して、正確性、完全性、継続性を確保すること                   |                 |         |       |                      |      |         |
| 継続的なトレーニングコースや研修会をセラピストに提供すること                               |                 |         |       |                      |      |         |

| 提案されている解決策                              | 前回の調査時の全体の意見の分布                                                                                                                                                                                                                                                                                                                | 全く同意しない | 同意しない | 同意する・しないのどちらでもない | 同意する | 完全に同意する |     |                  |     |       |    |         |    |  |  |  |  |  |
|-----------------------------------------|--------------------------------------------------------------------------------------------------------------------------------------------------------------------------------------------------------------------------------------------------------------------------------------------------------------------------------|---------|-------|------------------|------|---------|-----|------------------|-----|-------|----|---------|----|--|--|--|--|--|
| 場所や時間を特定しない研修会や講習会を設けること                | 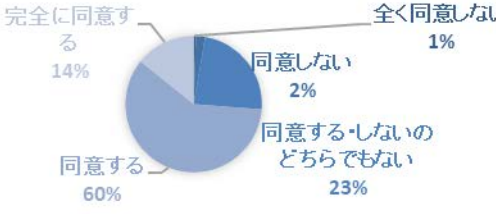 <table><tr><th>意見</th><th>割合</th></tr><tr><td>完全に同意する</td><td>14%</td></tr><tr><td>同意する</td><td>60%</td></tr><tr><td>同意する・しないのどちらでもない</td><td>23%</td></tr><tr><td>同意しない</td><td>2%</td></tr><tr><td>全く同意しない</td><td>1%</td></tr></table>  | 意見      | 割合    | 完全に同意する          | 14%  | 同意する    | 60% | 同意する・しないのどちらでもない | 23% | 同意しない | 2% | 全く同意しない | 1% |  |  |  |  |  |
| 意見                                      | 割合                                                                                                                                                                                                                                                                                                                             |         |       |                  |      |         |     |                  |     |       |    |         |    |  |  |  |  |  |
| 完全に同意する                                 | 14%                                                                                                                                                                                                                                                                                                                            |         |       |                  |      |         |     |                  |     |       |    |         |    |  |  |  |  |  |
| 同意する                                    | 60%                                                                                                                                                                                                                                                                                                                            |         |       |                  |      |         |     |                  |     |       |    |         |    |  |  |  |  |  |
| 同意する・しないのどちらでもない                        | 23%                                                                                                                                                                                                                                                                                                                            |         |       |                  |      |         |     |                  |     |       |    |         |    |  |  |  |  |  |
| 同意しない                                   | 2%                                                                                                                                                                                                                                                                                                                             |         |       |                  |      |         |     |                  |     |       |    |         |    |  |  |  |  |  |
| 全く同意しない                                 | 1%                                                                                                                                                                                                                                                                                                                             |         |       |                  |      |         |     |                  |     |       |    |         |    |  |  |  |  |  |
| EBP の実践について指導できる資格をつくること                | 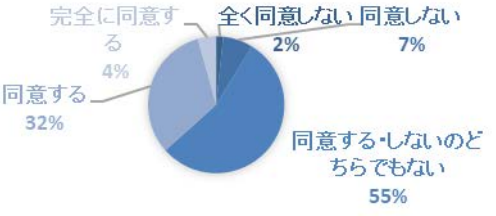 <table><tr><th>意見</th><th>割合</th></tr><tr><td>完全に同意する</td><td>4%</td></tr><tr><td>同意する</td><td>32%</td></tr><tr><td>同意する・しないのどちらでもない</td><td>55%</td></tr><tr><td>同意しない</td><td>7%</td></tr><tr><td>全く同意しない</td><td>2%</td></tr></table>   | 意見      | 割合    | 完全に同意する          | 4%   | 同意する    | 32% | 同意する・しないのどちらでもない | 55% | 同意しない | 7% | 全く同意しない | 2% |  |  |  |  |  |
| 意見                                      | 割合                                                                                                                                                                                                                                                                                                                             |         |       |                  |      |         |     |                  |     |       |    |         |    |  |  |  |  |  |
| 完全に同意する                                 | 4%                                                                                                                                                                                                                                                                                                                             |         |       |                  |      |         |     |                  |     |       |    |         |    |  |  |  |  |  |
| 同意する                                    | 32%                                                                                                                                                                                                                                                                                                                            |         |       |                  |      |         |     |                  |     |       |    |         |    |  |  |  |  |  |
| 同意する・しないのどちらでもない                        | 55%                                                                                                                                                                                                                                                                                                                            |         |       |                  |      |         |     |                  |     |       |    |         |    |  |  |  |  |  |
| 同意しない                                   | 7%                                                                                                                                                                                                                                                                                                                             |         |       |                  |      |         |     |                  |     |       |    |         |    |  |  |  |  |  |
| 全く同意しない                                 | 2%                                                                                                                                                                                                                                                                                                                             |         |       |                  |      |         |     |                  |     |       |    |         |    |  |  |  |  |  |
| EBP を積極的に実践している人の見学をすること(医師など)          | 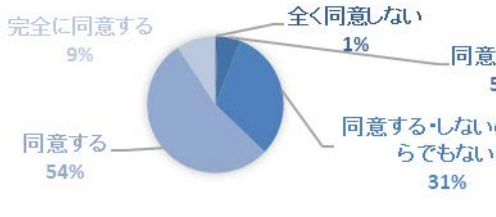 <table><tr><th>意見</th><th>割合</th></tr><tr><td>完全に同意する</td><td>9%</td></tr><tr><td>同意する</td><td>54%</td></tr><tr><td>同意する・しないのどちらでもない</td><td>31%</td></tr><tr><td>同意しない</td><td>5%</td></tr><tr><td>全く同意しない</td><td>1%</td></tr></table>  | 意見      | 割合    | 完全に同意する          | 9%   | 同意する    | 54% | 同意する・しないのどちらでもない | 31% | 同意しない | 5% | 全く同意しない | 1% |  |  |  |  |  |
| 意見                                      | 割合                                                                                                                                                                                                                                                                                                                             |         |       |                  |      |         |     |                  |     |       |    |         |    |  |  |  |  |  |
| 完全に同意する                                 | 9%                                                                                                                                                                                                                                                                                                                             |         |       |                  |      |         |     |                  |     |       |    |         |    |  |  |  |  |  |
| 同意する                                    | 54%                                                                                                                                                                                                                                                                                                                            |         |       |                  |      |         |     |                  |     |       |    |         |    |  |  |  |  |  |
| 同意する・しないのどちらでもない                        | 31%                                                                                                                                                                                                                                                                                                                            |         |       |                  |      |         |     |                  |     |       |    |         |    |  |  |  |  |  |
| 同意しない                                   | 5%                                                                                                                                                                                                                                                                                                                             |         |       |                  |      |         |     |                  |     |       |    |         |    |  |  |  |  |  |
| 全く同意しない                                 | 1%                                                                                                                                                                                                                                                                                                                             |         |       |                  |      |         |     |                  |     |       |    |         |    |  |  |  |  |  |
| 勤務先で EBP について学ぶ機会を作るための協会等による助成制度を設けること | 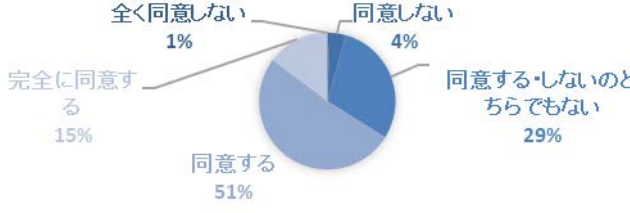 <table><tr><th>意見</th><th>割合</th></tr><tr><td>完全に同意する</td><td>15%</td></tr><tr><td>同意する</td><td>51%</td></tr><tr><td>同意する・しないのどちらでもない</td><td>29%</td></tr><tr><td>同意しない</td><td>4%</td></tr><tr><td>全く同意しない</td><td>1%</td></tr></table> | 意見      | 割合    | 完全に同意する          | 15%  | 同意する    | 51% | 同意する・しないのどちらでもない | 29% | 同意しない | 4% | 全く同意しない | 1% |  |  |  |  |  |
| 意見                                      | 割合                                                                                                                                                                                                                                                                                                                             |         |       |                  |      |         |     |                  |     |       |    |         |    |  |  |  |  |  |
| 完全に同意する                                 | 15%                                                                                                                                                                                                                                                                                                                            |         |       |                  |      |         |     |                  |     |       |    |         |    |  |  |  |  |  |
| 同意する                                    | 51%                                                                                                                                                                                                                                                                                                                            |         |       |                  |      |         |     |                  |     |       |    |         |    |  |  |  |  |  |
| 同意する・しないのどちらでもない                        | 29%                                                                                                                                                                                                                                                                                                                            |         |       |                  |      |         |     |                  |     |       |    |         |    |  |  |  |  |  |
| 同意しない                                   | 4%                                                                                                                                                                                                                                                                                                                             |         |       |                  |      |         |     |                  |     |       |    |         |    |  |  |  |  |  |
| 全く同意しない                                 | 1%                                                                                                                                                                                                                                                                                                                             |         |       |                  |      |         |     |                  |     |       |    |         |    |  |  |  |  |  |

| 提案されている解決策                                          | 前回の調査時の全体の意見の分布                                                                                                                                                                                                                                                                                                                | 全く同意しない | 同意しない | 同意する・しないのどちらでもない | 同意する | 完全に同意する |     |                  |     |       |     |         |    |  |  |  |  |  |
|-----------------------------------------------------|--------------------------------------------------------------------------------------------------------------------------------------------------------------------------------------------------------------------------------------------------------------------------------------------------------------------------------|---------|-------|------------------|------|---------|-----|------------------|-----|-------|-----|---------|----|--|--|--|--|--|
| EBP の実践に役に立つアプリを開発すること                              | 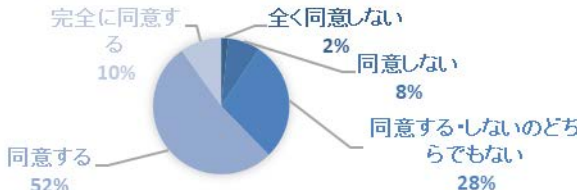 <table><tr><th>意見</th><th>割合</th></tr><tr><td>完全に同意する</td><td>10%</td></tr><tr><td>同意する</td><td>52%</td></tr><tr><td>同意する・しないのどちらでもない</td><td>28%</td></tr><tr><td>同意しない</td><td>8%</td></tr><tr><td>全く同意しない</td><td>2%</td></tr></table>  | 意見      | 割合    | 完全に同意する          | 10%  | 同意する    | 52% | 同意する・しないのどちらでもない | 28% | 同意しない | 8%  | 全く同意しない | 2% |  |  |  |  |  |
| 意見                                                  | 割合                                                                                                                                                                                                                                                                                                                             |         |       |                  |      |         |     |                  |     |       |     |         |    |  |  |  |  |  |
| 完全に同意する                                             | 10%                                                                                                                                                                                                                                                                                                                            |         |       |                  |      |         |     |                  |     |       |     |         |    |  |  |  |  |  |
| 同意する                                                | 52%                                                                                                                                                                                                                                                                                                                            |         |       |                  |      |         |     |                  |     |       |     |         |    |  |  |  |  |  |
| 同意する・しないのどちらでもない                                    | 28%                                                                                                                                                                                                                                                                                                                            |         |       |                  |      |         |     |                  |     |       |     |         |    |  |  |  |  |  |
| 同意しない                                               | 8%                                                                                                                                                                                                                                                                                                                             |         |       |                  |      |         |     |                  |     |       |     |         |    |  |  |  |  |  |
| 全く同意しない                                             | 2%                                                                                                                                                                                                                                                                                                                             |         |       |                  |      |         |     |                  |     |       |     |         |    |  |  |  |  |  |
| EBP を促進するために、協会等が医療福祉サービスの効果を示す研究活動を促進する取り組みを強化すること | 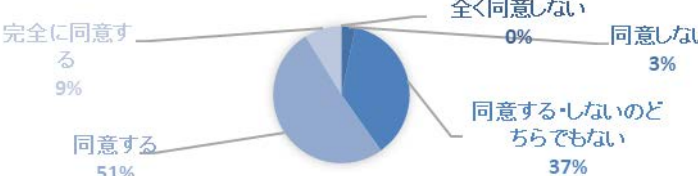 <table><tr><th>意見</th><th>割合</th></tr><tr><td>完全に同意する</td><td>9%</td></tr><tr><td>同意する</td><td>51%</td></tr><tr><td>同意する・しないのどちらでもない</td><td>37%</td></tr><tr><td>同意しない</td><td>3%</td></tr><tr><td>全く同意しない</td><td>0%</td></tr></table>    | 意見      | 割合    | 完全に同意する          | 9%   | 同意する    | 51% | 同意する・しないのどちらでもない | 37% | 同意しない | 3%  | 全く同意しない | 0% |  |  |  |  |  |
| 意見                                                  | 割合                                                                                                                                                                                                                                                                                                                             |         |       |                  |      |         |     |                  |     |       |     |         |    |  |  |  |  |  |
| 完全に同意する                                             | 9%                                                                                                                                                                                                                                                                                                                             |         |       |                  |      |         |     |                  |     |       |     |         |    |  |  |  |  |  |
| 同意する                                                | 51%                                                                                                                                                                                                                                                                                                                            |         |       |                  |      |         |     |                  |     |       |     |         |    |  |  |  |  |  |
| 同意する・しないのどちらでもない                                    | 37%                                                                                                                                                                                                                                                                                                                            |         |       |                  |      |         |     |                  |     |       |     |         |    |  |  |  |  |  |
| 同意しない                                               | 3%                                                                                                                                                                                                                                                                                                                             |         |       |                  |      |         |     |                  |     |       |     |         |    |  |  |  |  |  |
| 全く同意しない                                             | 0%                                                                                                                                                                                                                                                                                                                             |         |       |                  |      |         |     |                  |     |       |     |         |    |  |  |  |  |  |
| 初期の段階では奨励金や報奨物などのインセンティブを提供すること                     | 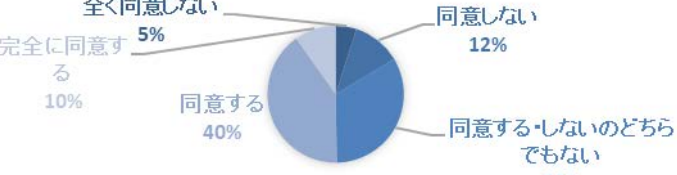 <table><tr><th>意見</th><th>割合</th></tr><tr><td>完全に同意する</td><td>10%</td></tr><tr><td>同意する</td><td>40%</td></tr><tr><td>同意する・しないのどちらでもない</td><td>33%</td></tr><tr><td>同意しない</td><td>12%</td></tr><tr><td>全く同意しない</td><td>5%</td></tr></table> | 意見      | 割合    | 完全に同意する          | 10%  | 同意する    | 40% | 同意する・しないのどちらでもない | 33% | 同意しない | 12% | 全く同意しない | 5% |  |  |  |  |  |
| 意見                                                  | 割合                                                                                                                                                                                                                                                                                                                             |         |       |                  |      |         |     |                  |     |       |     |         |    |  |  |  |  |  |
| 完全に同意する                                             | 10%                                                                                                                                                                                                                                                                                                                            |         |       |                  |      |         |     |                  |     |       |     |         |    |  |  |  |  |  |
| 同意する                                                | 40%                                                                                                                                                                                                                                                                                                                            |         |       |                  |      |         |     |                  |     |       |     |         |    |  |  |  |  |  |
| 同意する・しないのどちらでもない                                    | 33%                                                                                                                                                                                                                                                                                                                            |         |       |                  |      |         |     |                  |     |       |     |         |    |  |  |  |  |  |
| 同意しない                                               | 12%                                                                                                                                                                                                                                                                                                                            |         |       |                  |      |         |     |                  |     |       |     |         |    |  |  |  |  |  |
| 全く同意しない                                             | 5%                                                                                                                                                                                                                                                                                                                             |         |       |                  |      |         |     |                  |     |       |     |         |    |  |  |  |  |  |
| 意識向上セッションを開催して、スタッフのやる気を引き出し、患者に最善のケアを提供する意欲を高めること  | 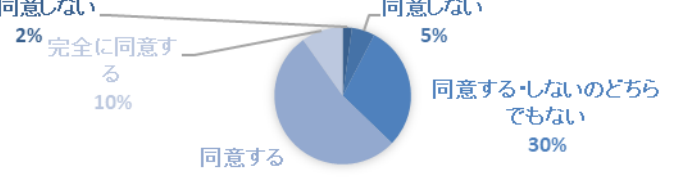 <table><tr><th>意見</th><th>割合</th></tr><tr><td>完全に同意する</td><td>10%</td></tr><tr><td>同意する</td><td>53%</td></tr><tr><td>同意する・しないのどちらでもない</td><td>30%</td></tr><tr><td>同意しない</td><td>5%</td></tr><tr><td>全く同意しない</td><td>2%</td></tr></table> | 意見      | 割合    | 完全に同意する          | 10%  | 同意する    | 53% | 同意する・しないのどちらでもない | 30% | 同意しない | 5%  | 全く同意しない | 2% |  |  |  |  |  |
| 意見                                                  | 割合                                                                                                                                                                                                                                                                                                                             |         |       |                  |      |         |     |                  |     |       |     |         |    |  |  |  |  |  |
| 完全に同意する                                             | 10%                                                                                                                                                                                                                                                                                                                            |         |       |                  |      |         |     |                  |     |       |     |         |    |  |  |  |  |  |
| 同意する                                                | 53%                                                                                                                                                                                                                                                                                                                            |         |       |                  |      |         |     |                  |     |       |     |         |    |  |  |  |  |  |
| 同意する・しないのどちらでもない                                    | 30%                                                                                                                                                                                                                                                                                                                            |         |       |                  |      |         |     |                  |     |       |     |         |    |  |  |  |  |  |
| 同意しない                                               | 5%                                                                                                                                                                                                                                                                                                                             |         |       |                  |      |         |     |                  |     |       |     |         |    |  |  |  |  |  |
| 全く同意しない                                             | 2%                                                                                                                                                                                                                                                                                                                             |         |       |                  |      |         |     |                  |     |       |     |         |    |  |  |  |  |  |

| 提案されている解決策                                                     | 前回の調査時の全体の意見の分布                                                                                                                                                                                                                                                                                                                | 全く同意しない | 同意しない | 同意する・しないのどちらでもない | 同意する | 完全に同意する |    |       |    |                  |     |      |     |  |  |  |  |  |
|----------------------------------------------------------------|--------------------------------------------------------------------------------------------------------------------------------------------------------------------------------------------------------------------------------------------------------------------------------------------------------------------------------|---------|-------|------------------|------|---------|----|-------|----|------------------|-----|------|-----|--|--|--|--|--|
| EBP の実践度合いを定量化するシステムを作り、遵守度が高まればそれに応じた各職場での評価が行われること           | 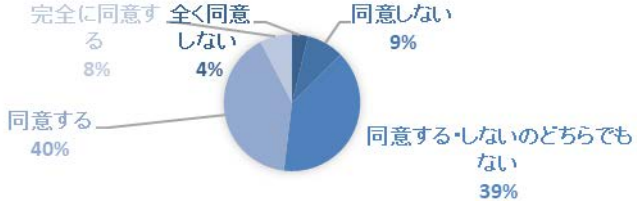 <table><tr><th>意見</th><th>割合</th></tr><tr><td>完全に同意する</td><td>8%</td></tr><tr><td>全く同意しない</td><td>4%</td></tr><tr><td>同意しない</td><td>9%</td></tr><tr><td>同意する・しないのどちらでもない</td><td>39%</td></tr><tr><td>同意する</td><td>40%</td></tr></table>    | 意見      | 割合    | 完全に同意する          | 8%   | 全く同意しない | 4% | 同意しない | 9% | 同意する・しないのどちらでもない | 39% | 同意する | 40% |  |  |  |  |  |
| 意見                                                             | 割合                                                                                                                                                                                                                                                                                                                             |         |       |                  |      |         |    |       |    |                  |     |      |     |  |  |  |  |  |
| 完全に同意する                                                        | 8%                                                                                                                                                                                                                                                                                                                             |         |       |                  |      |         |    |       |    |                  |     |      |     |  |  |  |  |  |
| 全く同意しない                                                        | 4%                                                                                                                                                                                                                                                                                                                             |         |       |                  |      |         |    |       |    |                  |     |      |     |  |  |  |  |  |
| 同意しない                                                          | 9%                                                                                                                                                                                                                                                                                                                             |         |       |                  |      |         |    |       |    |                  |     |      |     |  |  |  |  |  |
| 同意する・しないのどちらでもない                                               | 39%                                                                                                                                                                                                                                                                                                                            |         |       |                  |      |         |    |       |    |                  |     |      |     |  |  |  |  |  |
| 同意する                                                           | 40%                                                                                                                                                                                                                                                                                                                            |         |       |                  |      |         |    |       |    |                  |     |      |     |  |  |  |  |  |
| EBP の研修会に参加するだけでなく、その後勤務先での伝達者講習を開催した際にも生涯学習ポイントを得られるシステムを作ること | 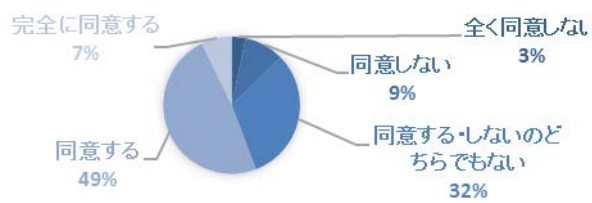 <table><tr><th>意見</th><th>割合</th></tr><tr><td>完全に同意する</td><td>7%</td></tr><tr><td>全く同意しない</td><td>3%</td></tr><tr><td>同意しない</td><td>9%</td></tr><tr><td>同意する・しないのどちらでもない</td><td>32%</td></tr><tr><td>同意する</td><td>49%</td></tr></table>   | 意見      | 割合    | 完全に同意する          | 7%   | 全く同意しない | 3% | 同意しない | 9% | 同意する・しないのどちらでもない | 32% | 同意する | 49% |  |  |  |  |  |
| 意見                                                             | 割合                                                                                                                                                                                                                                                                                                                             |         |       |                  |      |         |    |       |    |                  |     |      |     |  |  |  |  |  |
| 完全に同意する                                                        | 7%                                                                                                                                                                                                                                                                                                                             |         |       |                  |      |         |    |       |    |                  |     |      |     |  |  |  |  |  |
| 全く同意しない                                                        | 3%                                                                                                                                                                                                                                                                                                                             |         |       |                  |      |         |    |       |    |                  |     |      |     |  |  |  |  |  |
| 同意しない                                                          | 9%                                                                                                                                                                                                                                                                                                                             |         |       |                  |      |         |    |       |    |                  |     |      |     |  |  |  |  |  |
| 同意する・しないのどちらでもない                                               | 32%                                                                                                                                                                                                                                                                                                                            |         |       |                  |      |         |    |       |    |                  |     |      |     |  |  |  |  |  |
| 同意する                                                           | 49%                                                                                                                                                                                                                                                                                                                            |         |       |                  |      |         |    |       |    |                  |     |      |     |  |  |  |  |  |
| EBP の実践度合いを定量化するシステムを作り、遵守度が高まればそれに応じて診療報酬が増額されるシステムを作ること      | 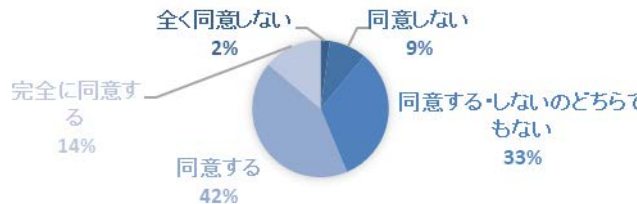 <table><tr><th>意見</th><th>割合</th></tr><tr><td>完全に同意する</td><td>14%</td></tr><tr><td>全く同意しない</td><td>2%</td></tr><tr><td>同意しない</td><td>9%</td></tr><tr><td>同意する・しないのどちらでもない</td><td>33%</td></tr><tr><td>同意する</td><td>42%</td></tr></table> | 意見      | 割合    | 完全に同意する          | 14%  | 全く同意しない | 2% | 同意しない | 9% | 同意する・しないのどちらでもない | 33% | 同意する | 42% |  |  |  |  |  |
| 意見                                                             | 割合                                                                                                                                                                                                                                                                                                                             |         |       |                  |      |         |    |       |    |                  |     |      |     |  |  |  |  |  |
| 完全に同意する                                                        | 14%                                                                                                                                                                                                                                                                                                                            |         |       |                  |      |         |    |       |    |                  |     |      |     |  |  |  |  |  |
| 全く同意しない                                                        | 2%                                                                                                                                                                                                                                                                                                                             |         |       |                  |      |         |    |       |    |                  |     |      |     |  |  |  |  |  |
| 同意しない                                                          | 9%                                                                                                                                                                                                                                                                                                                             |         |       |                  |      |         |    |       |    |                  |     |      |     |  |  |  |  |  |
| 同意する・しないのどちらでもない                                               | 33%                                                                                                                                                                                                                                                                                                                            |         |       |                  |      |         |    |       |    |                  |     |      |     |  |  |  |  |  |
| 同意する                                                           | 42%                                                                                                                                                                                                                                                                                                                            |         |       |                  |      |         |    |       |    |                  |     |      |     |  |  |  |  |  |

| 提案されている解決策                                           | 前回の調査時の全体の意見の分布                                                                                                                                                                                                                                                                                                                                              | 全く同意しない | 同意しない | 同意する・しないのどちらでもない | 同意する | 完全に同意する |     |                  |     |       |    |         |    |  |  |  |  |  |
|------------------------------------------------------|--------------------------------------------------------------------------------------------------------------------------------------------------------------------------------------------------------------------------------------------------------------------------------------------------------------------------------------------------------------|---------|-------|------------------|------|---------|-----|------------------|-----|-------|----|---------|----|--|--|--|--|--|
| 養成校の段階から医療福祉を学ぶ学生に EBP の必要性を強く認識させること                | 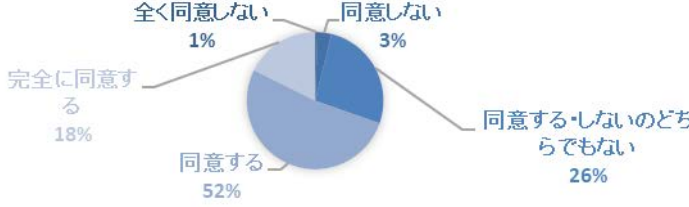 <table><thead><tr><th>意見</th><th>割合</th></tr></thead><tbody><tr><td>完全に同意する</td><td>18%</td></tr><tr><td>同意する</td><td>52%</td></tr><tr><td>同意する・しないのどちらでもない</td><td>26%</td></tr><tr><td>同意しない</td><td>3%</td></tr><tr><td>全く同意しない</td><td>1%</td></tr></tbody></table>   | 意見      | 割合    | 完全に同意する          | 18%  | 同意する    | 52% | 同意する・しないのどちらでもない | 26% | 同意しない | 3% | 全く同意しない | 1% |  |  |  |  |  |
| 意見                                                   | 割合                                                                                                                                                                                                                                                                                                                                                           |         |       |                  |      |         |     |                  |     |       |    |         |    |  |  |  |  |  |
| 完全に同意する                                              | 18%                                                                                                                                                                                                                                                                                                                                                          |         |       |                  |      |         |     |                  |     |       |    |         |    |  |  |  |  |  |
| 同意する                                                 | 52%                                                                                                                                                                                                                                                                                                                                                          |         |       |                  |      |         |     |                  |     |       |    |         |    |  |  |  |  |  |
| 同意する・しないのどちらでもない                                     | 26%                                                                                                                                                                                                                                                                                                                                                          |         |       |                  |      |         |     |                  |     |       |    |         |    |  |  |  |  |  |
| 同意しない                                                | 3%                                                                                                                                                                                                                                                                                                                                                           |         |       |                  |      |         |     |                  |     |       |    |         |    |  |  |  |  |  |
| 全く同意しない                                              | 1%                                                                                                                                                                                                                                                                                                                                                           |         |       |                  |      |         |     |                  |     |       |    |         |    |  |  |  |  |  |
| EBP の知識技術を得ようという意欲あるスタッフのために国内または海外で講習会を用意すること       | 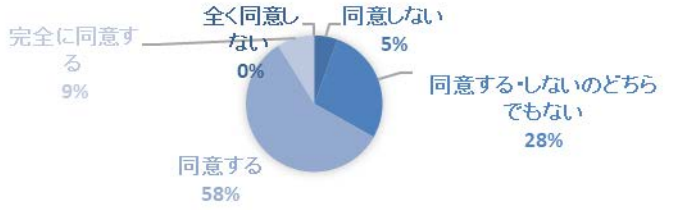 <table><thead><tr><th>意見</th><th>割合</th></tr></thead><tbody><tr><td>完全に同意する</td><td>9%</td></tr><tr><td>同意する</td><td>58%</td></tr><tr><td>同意する・しないのどちらでもない</td><td>28%</td></tr><tr><td>同意しない</td><td>5%</td></tr><tr><td>全く同意しない</td><td>0%</td></tr></tbody></table>    | 意見      | 割合    | 完全に同意する          | 9%   | 同意する    | 58% | 同意する・しないのどちらでもない | 28% | 同意しない | 5% | 全く同意しない | 0% |  |  |  |  |  |
| 意見                                                   | 割合                                                                                                                                                                                                                                                                                                                                                           |         |       |                  |      |         |     |                  |     |       |    |         |    |  |  |  |  |  |
| 完全に同意する                                              | 9%                                                                                                                                                                                                                                                                                                                                                           |         |       |                  |      |         |     |                  |     |       |    |         |    |  |  |  |  |  |
| 同意する                                                 | 58%                                                                                                                                                                                                                                                                                                                                                          |         |       |                  |      |         |     |                  |     |       |    |         |    |  |  |  |  |  |
| 同意する・しないのどちらでもない                                     | 28%                                                                                                                                                                                                                                                                                                                                                          |         |       |                  |      |         |     |                  |     |       |    |         |    |  |  |  |  |  |
| 同意しない                                                | 5%                                                                                                                                                                                                                                                                                                                                                           |         |       |                  |      |         |     |                  |     |       |    |         |    |  |  |  |  |  |
| 全く同意しない                                              | 0%                                                                                                                                                                                                                                                                                                                                                           |         |       |                  |      |         |     |                  |     |       |    |         |    |  |  |  |  |  |
| EBP の導入によるポジティブな結果を強調するスタッフ向けの意識向上セッションを開催すること       | 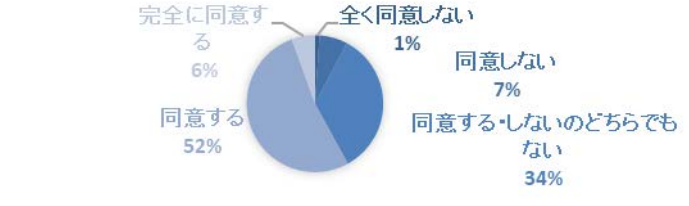 <table><thead><tr><th>意見</th><th>割合</th></tr></thead><tbody><tr><td>完全に同意する</td><td>6%</td></tr><tr><td>同意する</td><td>52%</td></tr><tr><td>同意する・しないのどちらでもない</td><td>34%</td></tr><tr><td>同意しない</td><td>7%</td></tr><tr><td>全く同意しない</td><td>1%</td></tr></tbody></table>   | 意見      | 割合    | 完全に同意する          | 6%   | 同意する    | 52% | 同意する・しないのどちらでもない | 34% | 同意しない | 7% | 全く同意しない | 1% |  |  |  |  |  |
| 意見                                                   | 割合                                                                                                                                                                                                                                                                                                                                                           |         |       |                  |      |         |     |                  |     |       |    |         |    |  |  |  |  |  |
| 完全に同意する                                              | 6%                                                                                                                                                                                                                                                                                                                                                           |         |       |                  |      |         |     |                  |     |       |    |         |    |  |  |  |  |  |
| 同意する                                                 | 52%                                                                                                                                                                                                                                                                                                                                                          |         |       |                  |      |         |     |                  |     |       |    |         |    |  |  |  |  |  |
| 同意する・しないのどちらでもない                                     | 34%                                                                                                                                                                                                                                                                                                                                                          |         |       |                  |      |         |     |                  |     |       |    |         |    |  |  |  |  |  |
| 同意しない                                                | 7%                                                                                                                                                                                                                                                                                                                                                           |         |       |                  |      |         |     |                  |     |       |    |         |    |  |  |  |  |  |
| 全く同意しない                                              | 1%                                                                                                                                                                                                                                                                                                                                                           |         |       |                  |      |         |     |                  |     |       |    |         |    |  |  |  |  |  |
| EBP の概念とそれを実践するツールである診療ガイドラインの客観的な有用性を広くセラピストに周知すること | 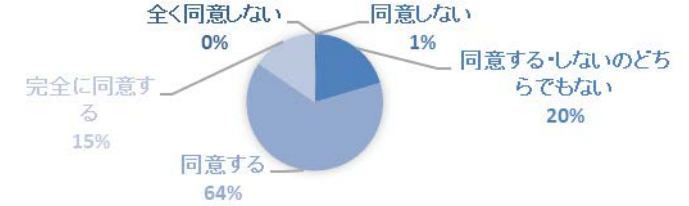 <table><thead><tr><th>意見</th><th>割合</th></tr></thead><tbody><tr><td>完全に同意する</td><td>15%</td></tr><tr><td>同意する</td><td>64%</td></tr><tr><td>同意する・しないのどちらでもない</td><td>20%</td></tr><tr><td>同意しない</td><td>1%</td></tr><tr><td>全く同意しない</td><td>0%</td></tr></tbody></table> | 意見      | 割合    | 完全に同意する          | 15%  | 同意する    | 64% | 同意する・しないのどちらでもない | 20% | 同意しない | 1% | 全く同意しない | 0% |  |  |  |  |  |
| 意見                                                   | 割合                                                                                                                                                                                                                                                                                                                                                           |         |       |                  |      |         |     |                  |     |       |    |         |    |  |  |  |  |  |
| 完全に同意する                                              | 15%                                                                                                                                                                                                                                                                                                                                                          |         |       |                  |      |         |     |                  |     |       |    |         |    |  |  |  |  |  |
| 同意する                                                 | 64%                                                                                                                                                                                                                                                                                                                                                          |         |       |                  |      |         |     |                  |     |       |    |         |    |  |  |  |  |  |
| 同意する・しないのどちらでもない                                     | 20%                                                                                                                                                                                                                                                                                                                                                          |         |       |                  |      |         |     |                  |     |       |    |         |    |  |  |  |  |  |
| 同意しない                                                | 1%                                                                                                                                                                                                                                                                                                                                                           |         |       |                  |      |         |     |                  |     |       |    |         |    |  |  |  |  |  |
| 全く同意しない                                              | 0%                                                                                                                                                                                                                                                                                                                                                           |         |       |                  |      |         |     |                  |     |       |    |         |    |  |  |  |  |  |

| 提案されている解決策                                                              | 前回の調査時の全体の意見の分布                                                                                                                                                                                                                                                                                                                | 全く同意しない | 同意しない | 同意する・しないのどちらでもない | 同意する | 完全に同意する |    |                  |     |      |     |         |     |  |  |  |  |  |
|-------------------------------------------------------------------------|--------------------------------------------------------------------------------------------------------------------------------------------------------------------------------------------------------------------------------------------------------------------------------------------------------------------------------|---------|-------|------------------|------|---------|----|------------------|-----|------|-----|---------|-----|--|--|--|--|--|
| EBP に関する情報や診療ガイドラインをセラピストと患者、両方の目に触れる機会を多く作ること                          | 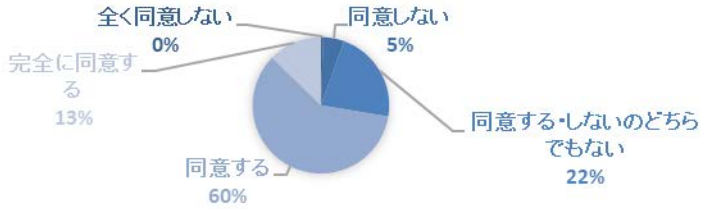 <table><tr><th>意見</th><th>割合</th></tr><tr><td>全く同意しない</td><td>0%</td></tr><tr><td>同意しない</td><td>5%</td></tr><tr><td>同意する・しないのどちらでもない</td><td>22%</td></tr><tr><td>同意する</td><td>60%</td></tr><tr><td>完全に同意する</td><td>13%</td></tr></table>   | 意見      | 割合    | 全く同意しない          | 0%   | 同意しない   | 5% | 同意する・しないのどちらでもない | 22% | 同意する | 60% | 完全に同意する | 13% |  |  |  |  |  |
| 意見                                                                      | 割合                                                                                                                                                                                                                                                                                                                             |         |       |                  |      |         |    |                  |     |      |     |         |     |  |  |  |  |  |
| 全く同意しない                                                                 | 0%                                                                                                                                                                                                                                                                                                                             |         |       |                  |      |         |    |                  |     |      |     |         |     |  |  |  |  |  |
| 同意しない                                                                   | 5%                                                                                                                                                                                                                                                                                                                             |         |       |                  |      |         |    |                  |     |      |     |         |     |  |  |  |  |  |
| 同意する・しないのどちらでもない                                                        | 22%                                                                                                                                                                                                                                                                                                                            |         |       |                  |      |         |    |                  |     |      |     |         |     |  |  |  |  |  |
| 同意する                                                                    | 60%                                                                                                                                                                                                                                                                                                                            |         |       |                  |      |         |    |                  |     |      |     |         |     |  |  |  |  |  |
| 完全に同意する                                                                 | 13%                                                                                                                                                                                                                                                                                                                            |         |       |                  |      |         |    |                  |     |      |     |         |     |  |  |  |  |  |
| 著名人が EBP に関する情報を誰もが受け取りやすい形で身近な媒体を通じて表現すること (Youtube などを利用して)           | 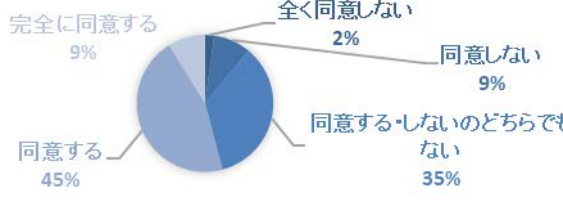 <table><tr><th>意見</th><th>割合</th></tr><tr><td>全く同意しない</td><td>2%</td></tr><tr><td>同意しない</td><td>9%</td></tr><tr><td>同意する・しないのどちらでもない</td><td>35%</td></tr><tr><td>同意する</td><td>45%</td></tr><tr><td>完全に同意する</td><td>9%</td></tr></table>   | 意見      | 割合    | 全く同意しない          | 2%   | 同意しない   | 9% | 同意する・しないのどちらでもない | 35% | 同意する | 45% | 完全に同意する | 9%  |  |  |  |  |  |
| 意見                                                                      | 割合                                                                                                                                                                                                                                                                                                                             |         |       |                  |      |         |    |                  |     |      |     |         |     |  |  |  |  |  |
| 全く同意しない                                                                 | 2%                                                                                                                                                                                                                                                                                                                             |         |       |                  |      |         |    |                  |     |      |     |         |     |  |  |  |  |  |
| 同意しない                                                                   | 9%                                                                                                                                                                                                                                                                                                                             |         |       |                  |      |         |    |                  |     |      |     |         |     |  |  |  |  |  |
| 同意する・しないのどちらでもない                                                        | 35%                                                                                                                                                                                                                                                                                                                            |         |       |                  |      |         |    |                  |     |      |     |         |     |  |  |  |  |  |
| 同意する                                                                    | 45%                                                                                                                                                                                                                                                                                                                            |         |       |                  |      |         |    |                  |     |      |     |         |     |  |  |  |  |  |
| 完全に同意する                                                                 | 9%                                                                                                                                                                                                                                                                                                                             |         |       |                  |      |         |    |                  |     |      |     |         |     |  |  |  |  |  |
| 患者を治療の意思決定プロセスに巻き込むこと                                                   | 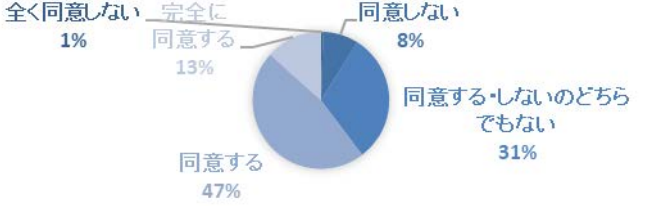 <table><tr><th>意見</th><th>割合</th></tr><tr><td>全く同意しない</td><td>1%</td></tr><tr><td>同意しない</td><td>8%</td></tr><tr><td>同意する・しないのどちらでもない</td><td>31%</td></tr><tr><td>同意する</td><td>47%</td></tr><tr><td>完全に同意する</td><td>13%</td></tr></table>  | 意見      | 割合    | 全く同意しない          | 1%   | 同意しない   | 8% | 同意する・しないのどちらでもない | 31% | 同意する | 47% | 完全に同意する | 13% |  |  |  |  |  |
| 意見                                                                      | 割合                                                                                                                                                                                                                                                                                                                             |         |       |                  |      |         |    |                  |     |      |     |         |     |  |  |  |  |  |
| 全く同意しない                                                                 | 1%                                                                                                                                                                                                                                                                                                                             |         |       |                  |      |         |    |                  |     |      |     |         |     |  |  |  |  |  |
| 同意しない                                                                   | 8%                                                                                                                                                                                                                                                                                                                             |         |       |                  |      |         |    |                  |     |      |     |         |     |  |  |  |  |  |
| 同意する・しないのどちらでもない                                                        | 31%                                                                                                                                                                                                                                                                                                                            |         |       |                  |      |         |    |                  |     |      |     |         |     |  |  |  |  |  |
| 同意する                                                                    | 47%                                                                                                                                                                                                                                                                                                                            |         |       |                  |      |         |    |                  |     |      |     |         |     |  |  |  |  |  |
| 完全に同意する                                                                 | 13%                                                                                                                                                                                                                                                                                                                            |         |       |                  |      |         |    |                  |     |      |     |         |     |  |  |  |  |  |
| 患者が EBP に関心を持つようなガイドラインを作成し、掲示板、パンフレット、およびホームページのロールアップバナーを通じてそれらを広めること | 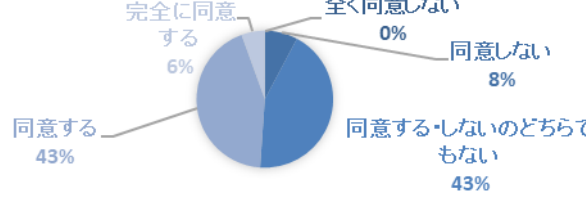 <table><tr><th>意見</th><th>割合</th></tr><tr><td>全く同意しない</td><td>0%</td></tr><tr><td>同意しない</td><td>8%</td></tr><tr><td>同意する・しないのどちらでもない</td><td>43%</td></tr><tr><td>同意する</td><td>43%</td></tr><tr><td>完全に同意する</td><td>6%</td></tr></table> | 意見      | 割合    | 全く同意しない          | 0%   | 同意しない   | 8% | 同意する・しないのどちらでもない | 43% | 同意する | 43% | 完全に同意する | 6%  |  |  |  |  |  |
| 意見                                                                      | 割合                                                                                                                                                                                                                                                                                                                             |         |       |                  |      |         |    |                  |     |      |     |         |     |  |  |  |  |  |
| 全く同意しない                                                                 | 0%                                                                                                                                                                                                                                                                                                                             |         |       |                  |      |         |    |                  |     |      |     |         |     |  |  |  |  |  |
| 同意しない                                                                   | 8%                                                                                                                                                                                                                                                                                                                             |         |       |                  |      |         |    |                  |     |      |     |         |     |  |  |  |  |  |
| 同意する・しないのどちらでもない                                                        | 43%                                                                                                                                                                                                                                                                                                                            |         |       |                  |      |         |    |                  |     |      |     |         |     |  |  |  |  |  |
| 同意する                                                                    | 43%                                                                                                                                                                                                                                                                                                                            |         |       |                  |      |         |    |                  |     |      |     |         |     |  |  |  |  |  |
| 完全に同意する                                                                 | 6%                                                                                                                                                                                                                                                                                                                             |         |       |                  |      |         |    |                  |     |      |     |         |     |  |  |  |  |  |

| 提案されている解決策                                                 | 前回の調査時の全体の意見の分布                                                                                                                                                                                                                                                         | 全く同意しない | 同意しない | 同意する・しないのどちらでもない | 同意する | 完全に同意する |     |                  |     |       |     |         |    |  |  |  |  |  |
|------------------------------------------------------------|-------------------------------------------------------------------------------------------------------------------------------------------------------------------------------------------------------------------------------------------------------------------------|---------|-------|------------------|------|---------|-----|------------------|-----|-------|-----|---------|----|--|--|--|--|--|
| テレビ、新聞、雑誌などのマスメディアで広く EBP を取り上げ、EBP の実践が当然であるという社会の認識を作ること | <table><thead><tr><th>意見</th><th>割合</th></tr></thead><tbody><tr><td>完全に同意する</td><td>8%</td></tr><tr><td>同意する</td><td>35%</td></tr><tr><td>同意する・しないのどちらでもない</td><td>44%</td></tr><tr><td>同意しない</td><td>11%</td></tr><tr><td>全く同意しない</td><td>2%</td></tr></tbody></table> | 意見      | 割合    | 完全に同意する          | 8%   | 同意する    | 35% | 同意する・しないのどちらでもない | 44% | 同意しない | 11% | 全く同意しない | 2% |  |  |  |  |  |
| 意見                                                         | 割合                                                                                                                                                                                                                                                                      |         |       |                  |      |         |     |                  |     |       |     |         |    |  |  |  |  |  |
| 完全に同意する                                                    | 8%                                                                                                                                                                                                                                                                      |         |       |                  |      |         |     |                  |     |       |     |         |    |  |  |  |  |  |
| 同意する                                                       | 35%                                                                                                                                                                                                                                                                     |         |       |                  |      |         |     |                  |     |       |     |         |    |  |  |  |  |  |
| 同意する・しないのどちらでもない                                           | 44%                                                                                                                                                                                                                                                                     |         |       |                  |      |         |     |                  |     |       |     |         |    |  |  |  |  |  |
| 同意しない                                                      | 11%                                                                                                                                                                                                                                                                     |         |       |                  |      |         |     |                  |     |       |     |         |    |  |  |  |  |  |
| 全く同意しない                                                    | 2%                                                                                                                                                                                                                                                                      |         |       |                  |      |         |     |                  |     |       |     |         |    |  |  |  |  |  |
| EBPの遵守度に関する医療福祉サービスの質を患者側から見えるようにすること                      | <table><thead><tr><th>意見</th><th>割合</th></tr></thead><tbody><tr><td>完全に同意する</td><td>8%</td></tr><tr><td>同意する</td><td>50%</td></tr><tr><td>同意する・しないのどちらでもない</td><td>37%</td></tr><tr><td>同意しない</td><td>5%</td></tr><tr><td>全く同意しない</td><td>0%</td></tr></tbody></table>  | 意見      | 割合    | 完全に同意する          | 8%   | 同意する    | 50% | 同意する・しないのどちらでもない | 37% | 同意しない | 5%  | 全く同意しない | 0% |  |  |  |  |  |
| 意見                                                         | 割合                                                                                                                                                                                                                                                                      |         |       |                  |      |         |     |                  |     |       |     |         |    |  |  |  |  |  |
| 完全に同意する                                                    | 8%                                                                                                                                                                                                                                                                      |         |       |                  |      |         |     |                  |     |       |     |         |    |  |  |  |  |  |
| 同意する                                                       | 50%                                                                                                                                                                                                                                                                     |         |       |                  |      |         |     |                  |     |       |     |         |    |  |  |  |  |  |
| 同意する・しないのどちらでもない                                           | 37%                                                                                                                                                                                                                                                                     |         |       |                  |      |         |     |                  |     |       |     |         |    |  |  |  |  |  |
| 同意しない                                                      | 5%                                                                                                                                                                                                                                                                      |         |       |                  |      |         |     |                  |     |       |     |         |    |  |  |  |  |  |
| 全く同意しない                                                    | 0%                                                                                                                                                                                                                                                                      |         |       |                  |      |         |     |                  |     |       |     |         |    |  |  |  |  |  |
